# Supplementary material for: Single cell study of adipose tissue mediated lipid droplet formation and biochemical alterations in breast cancer cells
Source: Royal Society of Chemistry journal article supplement (doi:10.1039/c9an00816k), 2019-01-01
Supplement: c9an00816k1.pdf [file c9an00816k1.pdf]

## Supplementary Information Bluecher, Zilberfain et al.

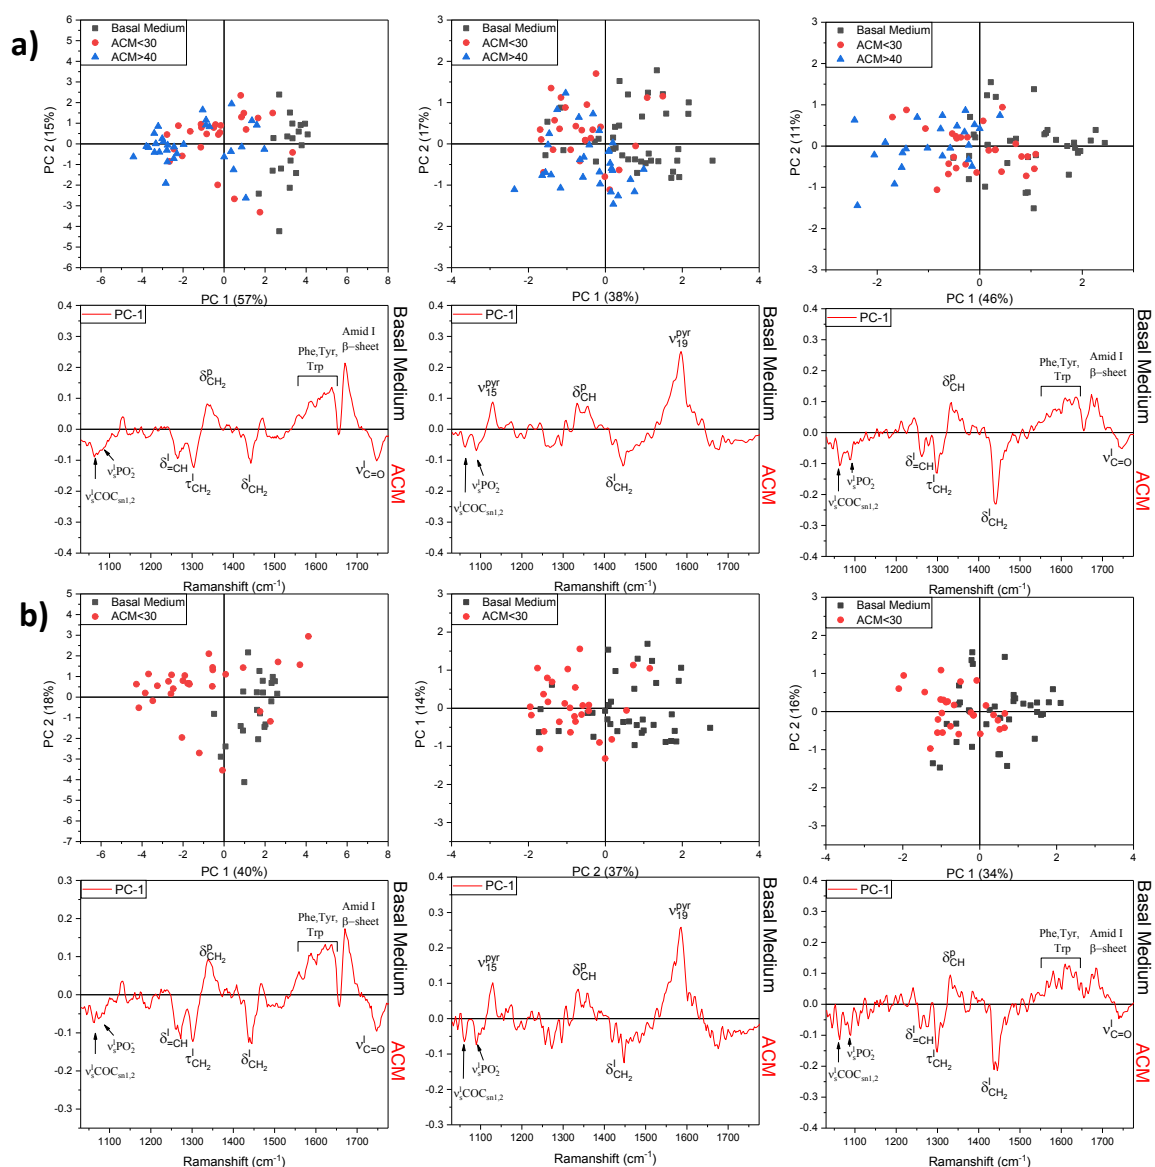

**Figure S1:** **a)** PCA of the SNV normalized spectra of LDs, mitochondria and ER extracted from single MDA-MB-231 cells which were incubated with basal medium, ACM<sub><30></sub> and ACM<sub>>40</sub>. The separation of the cell populations occurs gradually from basal medium over ACM<sub><30></sub> to ACM<sub>>40</sub> along PC 1, which is displayed in the loading plots below. **b)** PCA of the SNV normalized spectra of LDs, mitochondria and ER extracted from breast cancer cells incubated with basal medium and ACM<sub><30></sub>. The cell populations are separated in the score plot along PC 1, which is displayed in the loading plots below. ( $\delta$ , deformation;  $\nu$ , stretching;  $\tau$  - twisting; l – lipids; p – proteins, pyr – pyrrole rings of porphyrin in cytochrome)
